# Supplementary material for: Functional role of BTB and CNC Homology 1 gene in pancreatic cancer and its association with survival in patients treated with gemcitabine
Source: PubMed Central journal article supplement — Theranostics. 2018 May 23;8(12):3366–79. doi: 10.7150/thno.23978 (PMC6010980; doi:10.7150/thno.23978), 2018-05-23
Supplement: thnov08p3366s1.pdf [file thnov08p3366s1.pdf]

## Supplementary Information

### Functional role of BTB and CNC Homology 1 gene in pancreatic cancer and its association with survival in patients treated with gemcitabine

Xudong Huang<sup>1\*</sup>, Jian Zheng<sup>2\*</sup>, Jun Li<sup>1\*</sup>, Xu Che<sup>3\*</sup>, Wenle Tan<sup>1</sup>, Wen Tan<sup>1</sup>, Mingming Shao<sup>1</sup>, Xinxin Cheng<sup>1</sup>, Zhongli Du<sup>1</sup>, Yanjie Zhao<sup>1</sup>, Chengfeng Wang<sup>3</sup>, Chen Wu<sup>1</sup>, Dongxin Lin<sup>1</sup>

<sup>1</sup>Department of Etiology and Carcinogenesis, National Cancer Center/Cancer Hospital, Chinese Academy of Medical Sciences and Peking Union Medical College, Beijing 100021, China

<sup>2</sup>SunYat-sen University Cancer Center, State Key Laboratory of Oncology in South China and Collaborative Innovation Center for Cancer Medicine, Guangzhou 510060, China

<sup>3</sup>Department of Abdominal Surgery, National Cancer Center/Cancer Hospital, Chinese Academy of Medical Sciences and Peking Union Medical College, Beijing 100021, China

\*These authors contributed equally to this work.

**Corresponding authors:** Dongxin Lin, Department of Etiology and Carcinogenesis, Cancer Hospital, Chinese Academy of Medical Sciences. Phone: 10-87788715; Fax: 10-67722460; Email: lindx@icams.ac.cn; Chen Wu, Department of Etiology and Carcinogenesis, Cancer Hospital, Chinese Academy of Medical Sciences. Phone: 10-87787395; Fax: 10-67722460; Email: chenwu@icams.ac.cn or Chengfeng Wang, Department of Abdominal Surgery, Cancer Hospital, Chinese Academy of Medical Sciences. Phone: 10-87788491; Email: wangcf369@medmail.com.cn.

## Supplementary Figure legends

### Figure S1. Bioinformatics analysis of differentially expressed genes in CFPAC-1 cells with *BACH1* knockdown.

(A) GO biological processes and (B) GSEA of gene signatures regulated by *BACH1*. For GO analysis,  $P < 0.05$  was set as a criterion for significance (dotted line indicates  $P = 0.05$ ). For GSEA analysis, the significant level was  $FDR < 0.25$ .

### Figure S2. Validation of 7 genes regulated by *BACH1* which were identified by integrated analysis of ChIP-seq and microarray data in CFPAC-1 and BXPC-3 cells.

The levels of *FTL*, *FTH1*, *SQSTM1*, *TFE3*, *GCLC*, *NQO2* and *ITPR2* mRNA were examined by qRT-PCR. Results are mean  $\pm$  SEM relative to *GAPDH*; \*,  $P < 0.05$ ; \*\*,  $P < 0.01$  and \*\*\*,  $P < 0.001$ .

### Figure S3. *BACH1* and *NRF2* regulate *HMOX1* expression in a competitive binding manner.

(A) Disturb the expression of *BACH1* has no effect on the *NRF2* expression in both mRNA and protein levels in CFPAC-1 and BXPC-3 cells. (B) Chromatin immunoprecipitation assays showing binding of *NRF2* to two enhancers (EN1 and EN2) in the upstream of *HMOX1* in CFPAC-1 and BXPC-3 cells. Overexpression of *BACH1* in these cells substantially reduced enrichment of *NRF2* in EN1 and EN2, while knockdown of *BACH1* substantially increased the enrichment in these two enhancers. Fold enrichment (mean  $\pm$  SEM) represents DNA levels associated with *NRF2* or IgG relative to an input control from three independent experiments. IgG served as negative control. \*,  $P < 0.05$ ; \*\*,  $P < 0.01$  and \*\*\*,  $P < 0.001$  compared with Control or shControl.

### Figure S4. *BACH1* inhibits PDAC cell proliferation via HO-1.

(A–B) Proliferation profile (A) and colony formation ability (B) of control CFPAC-1 and BXPC-3 cells and cells overexpressing *BACH1* transiently transfected with or without pcDNA3.1-HMOX1. Results are mean  $\pm$  SEM from three experiments and each experiment had six replicates. \*,  $P < 0.05$  and #,  $P < 0.001$  compared with corresponding control. (C–D) Proliferation profile (C) and colony formation ability (D) of control CFPAC-1 and BXPC-3 cells and cells with knockdown of *BACH1* transiently transfected with or without *HMOX1* siRNAs. Results are mean  $\pm$  SEM from three experiments and each experiment had four replicates. \*,  $P < 0.05$ ; \$,  $P < 0.05$  and #,  $P < 0.05$  compared with the corresponding control.

**Figure S5. Effects of *BACH1* overexpression or knockdown on the expression of some genes involved in the signaling pathways of proliferation and angiogenesis in CFPAC-1 and BXPC-3 cells.**

Overexpression of *BACH1* suppressed mRNA expression of *HIF1A* (A) and *VEGF* (B) but promoted mRNA expression of *PTEN* (C). The reverse results were observed in the same cells with knockdown of *BACH1* expression (A–C). Results are mean  $\pm$ SEM relative to *GAPDH*. *P*-values are for Student's *t*-test.

**Figure S6. Northern blotting of miR-1257 isolated from CFPAC-1 and BXPC-3 cells.**

The image shows the presence of miR-1257 and its expected molecular size.

**Figure S7. DNA sequencing analysis of *BACH1* rs372883 genotype.**

The results show different genotypes in BXPC-3 (A), CFPAC-1 (B) and Capan-2 (C) cells.

**Figure S8. The expression of genes involved in the drug resistant in PDAC cells depends on *BACH1* in an allele-specific manner.**

(A–C) Effect of miR-1257 on the expression levels of *ABCC2*, *MGST1* and *NQO1* in BXPC-3 (A), CFPAC-1 (B) and Capan-2 (C) cells carrying the rs372883 CC, CT or TT genotype, respectively. Cells were transiently transfected with miR-1257 or its inhibitor, and gene expressions were examined by qRT-PCR. Results are mean  $\pm$ SEM relative to *GAPDH*; \*,  $P < 0.05$ ; \*\*,  $P < 0.01$  and \*\*\*,  $P < 0.001$ .

**Figure S9. *BACH1* regulates expression of EMT and stemness associated genes.**

(A) Western blot analysis of *E-cadherin*, *ZO-1*, *ZEB1*, *Vimentin* and *Slug* in CFPAC-1 and BXPC-3 cells with overexpression or knockdown of *BACH1*. (B) Western blot analysis of *OCT4*, *ABCG2*, *ALDH1* and *TRA-1-60* in CFPAC-1 and BXPC-3 cells with overexpression or knockdown of *BACH1*. (C–D) Correlation between *BACH1* and *ABCG2*, *CXCR4* mRNA levels in pancreatic cancer tissues. Data are from Oncomine database generated by Pei et al. [27] (C) and Badea et al. [28] (D).

# Figure S1

A

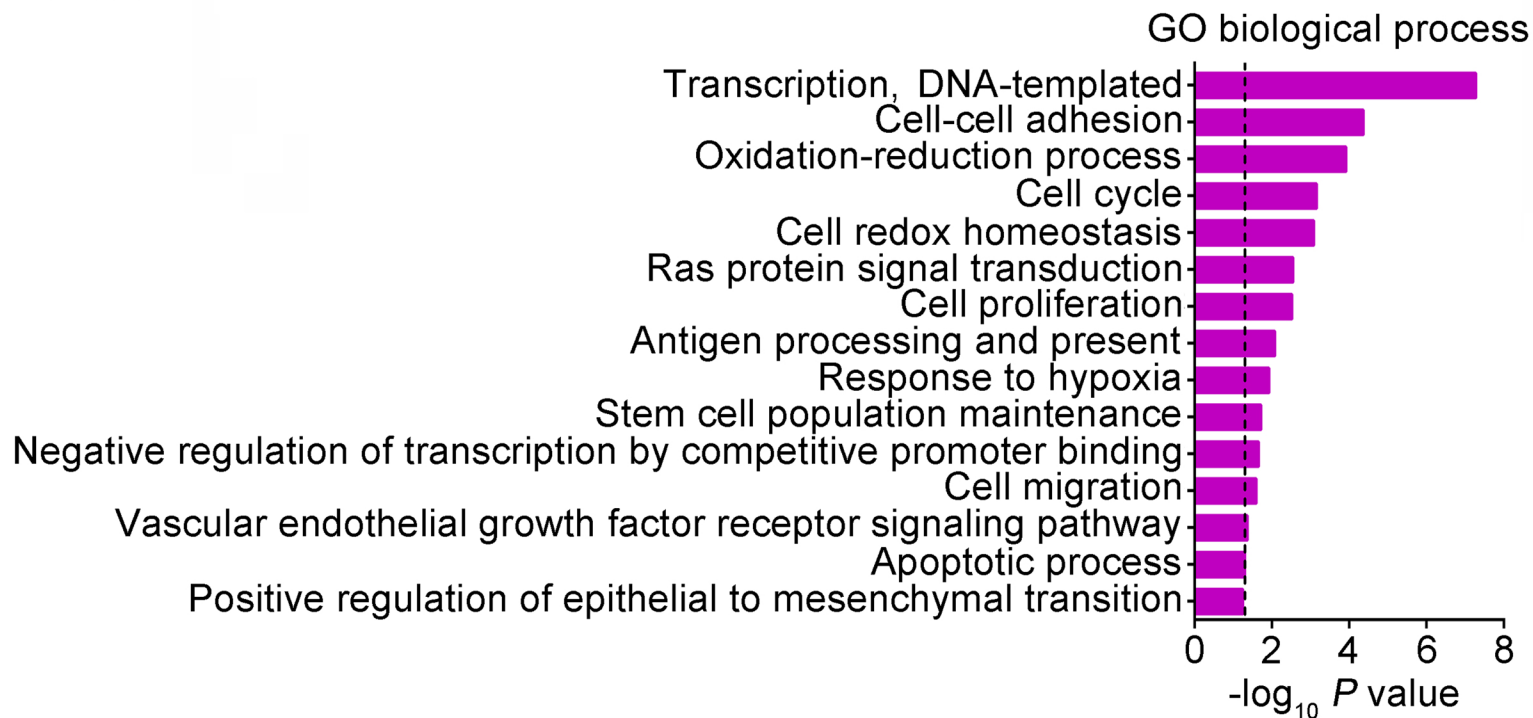

B

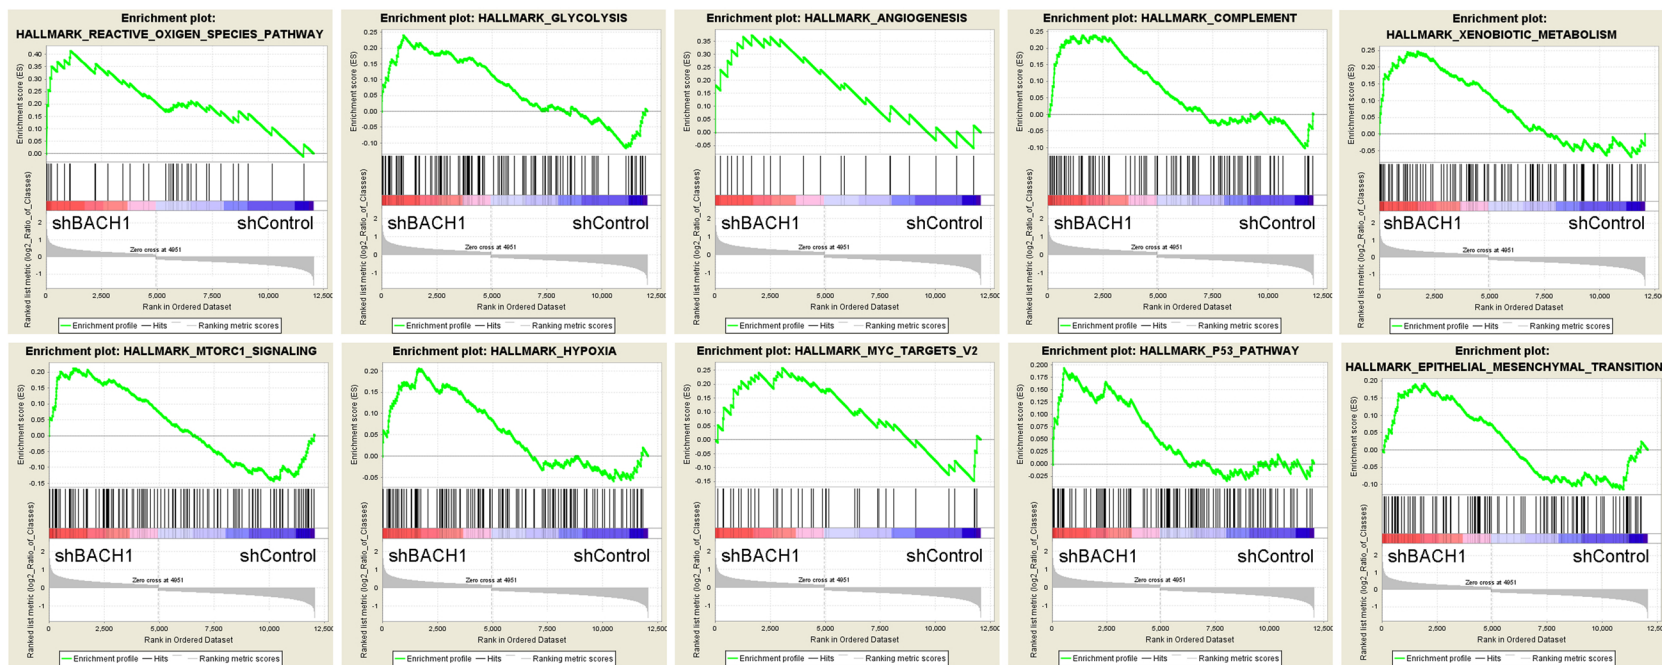



Figure S2

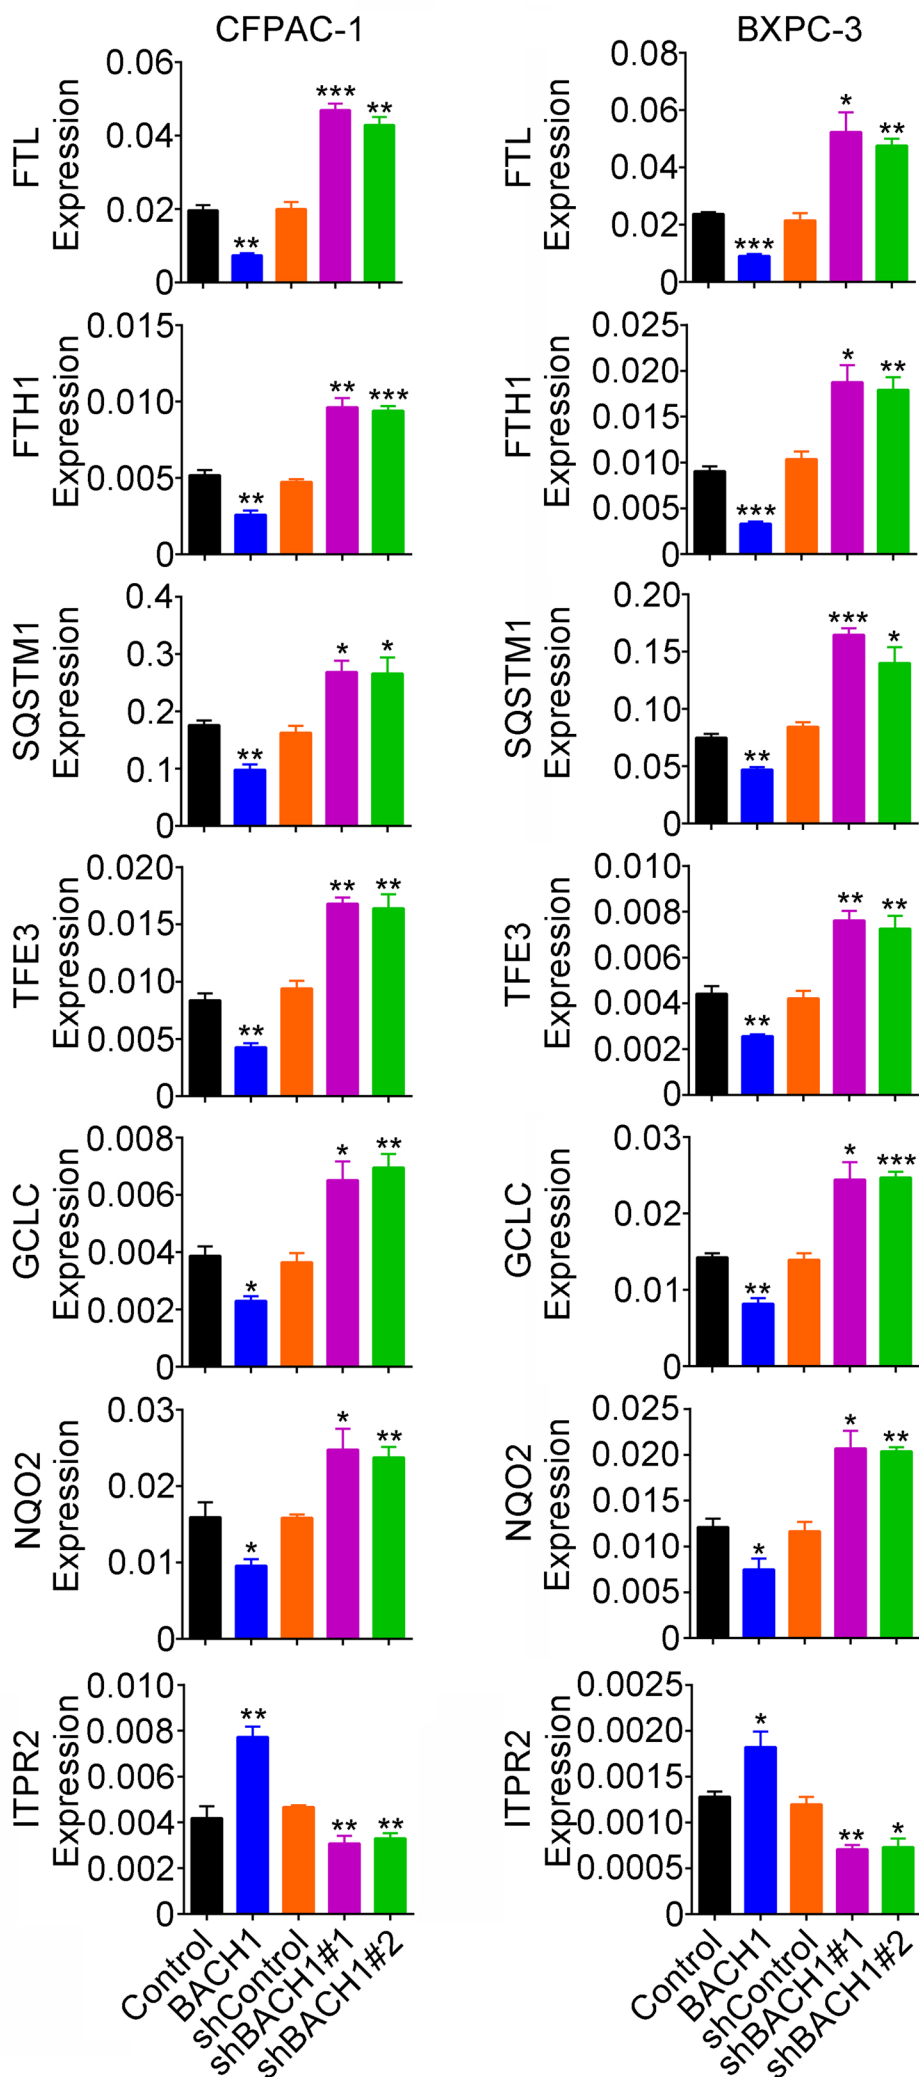

Figure S3

A

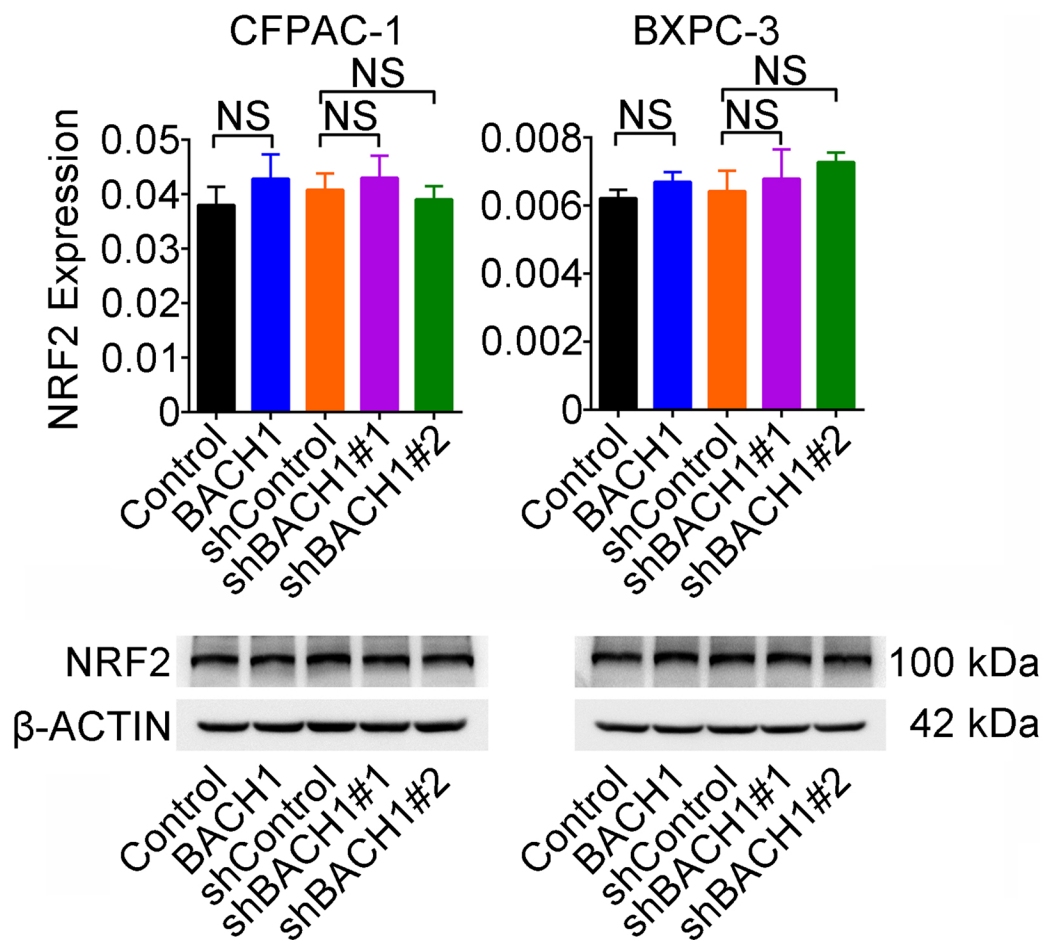

B

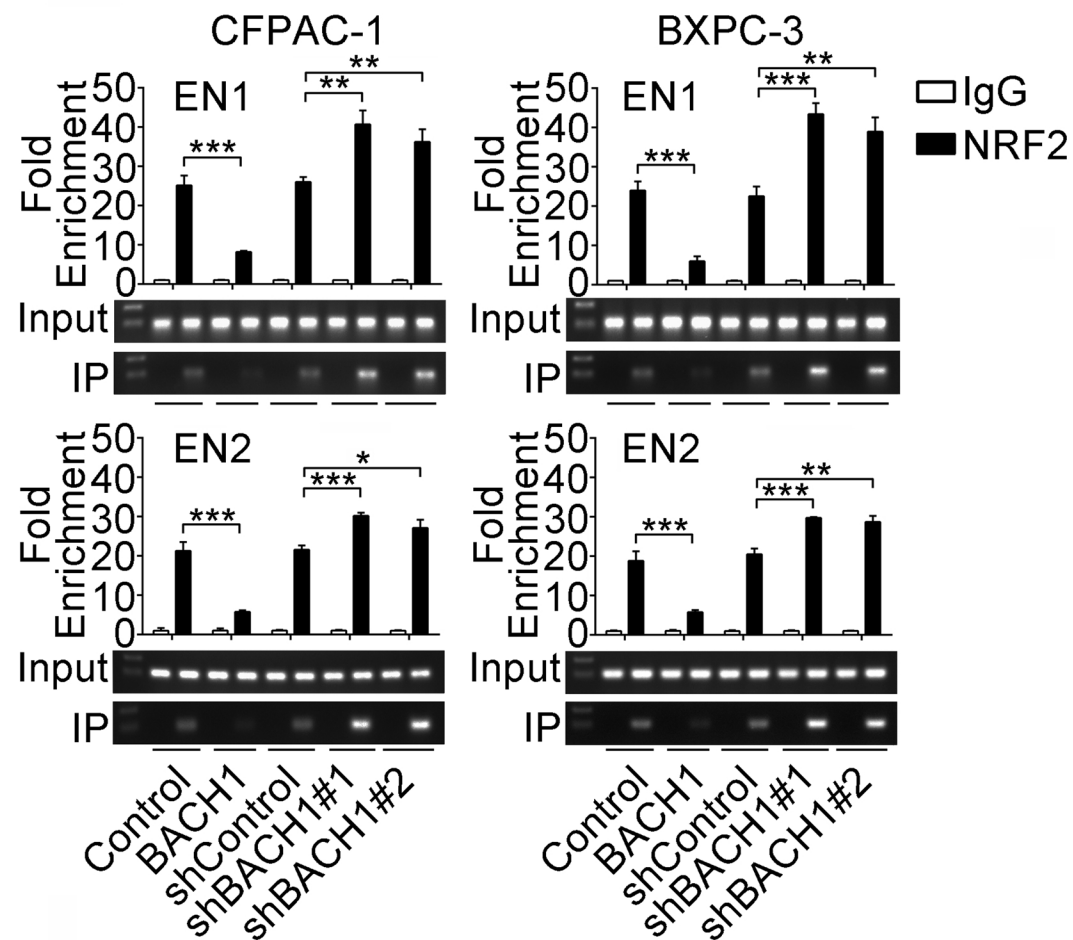

Figure S4

A

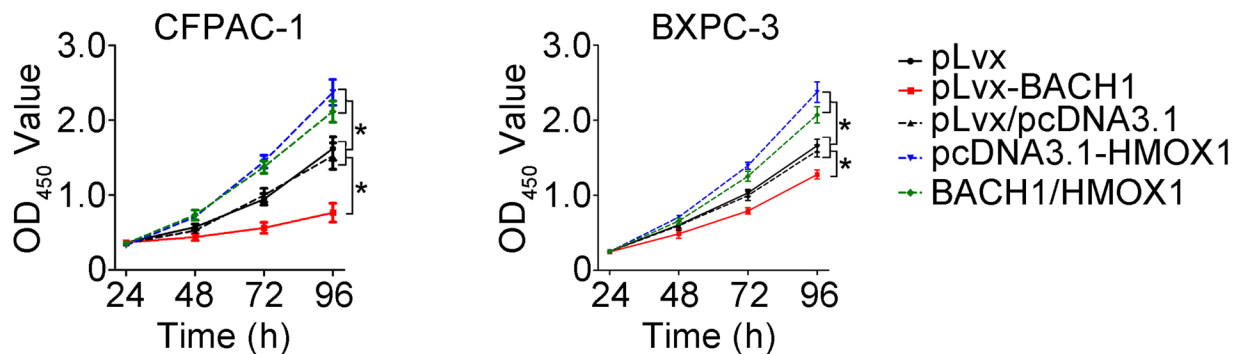

B

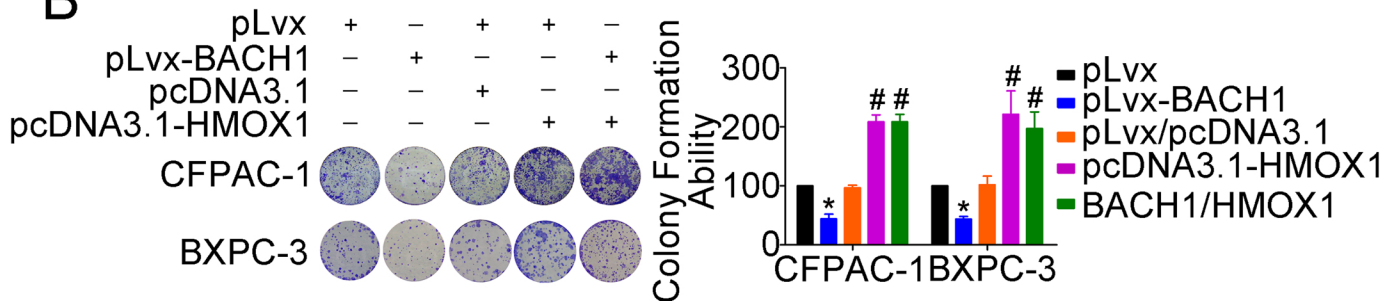

C

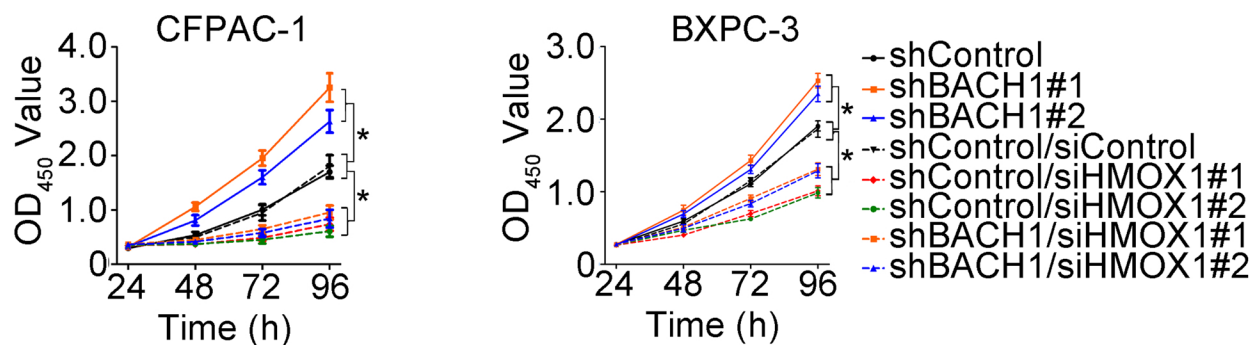

D

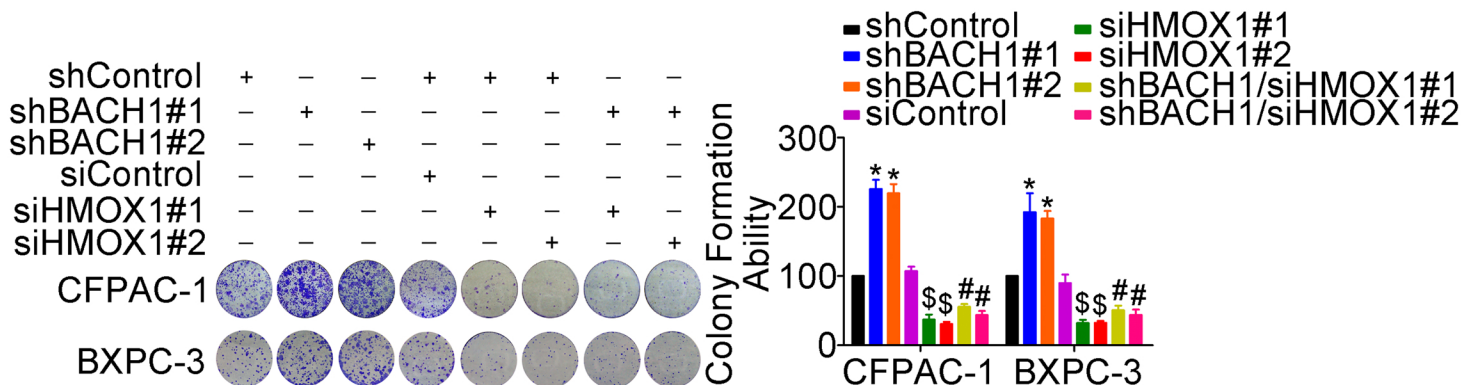

Figure S5

A

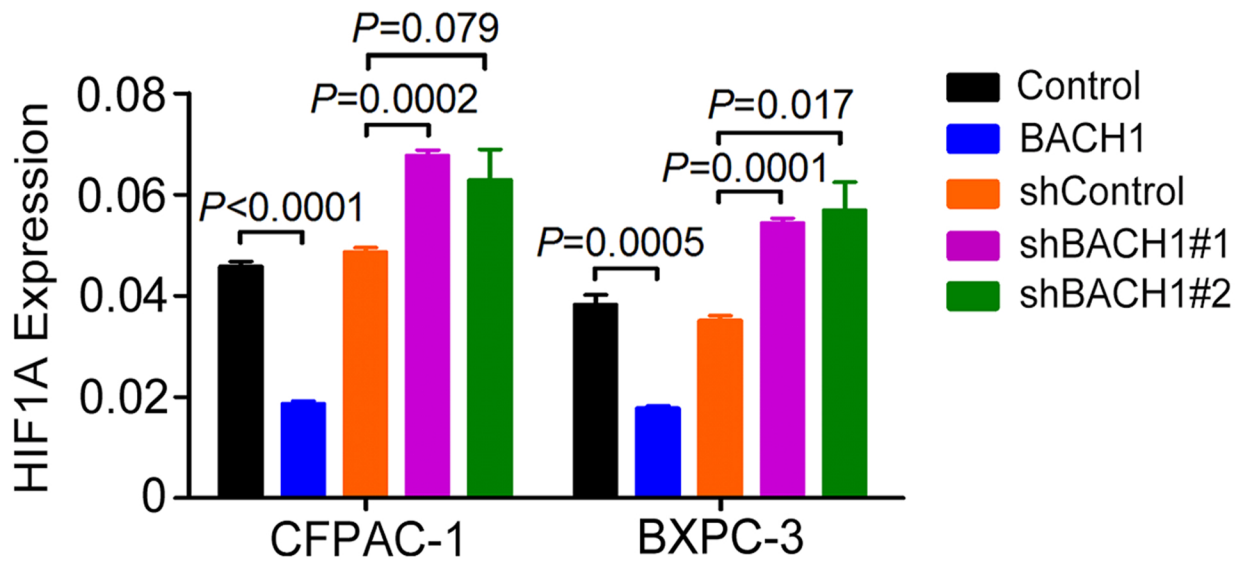

B

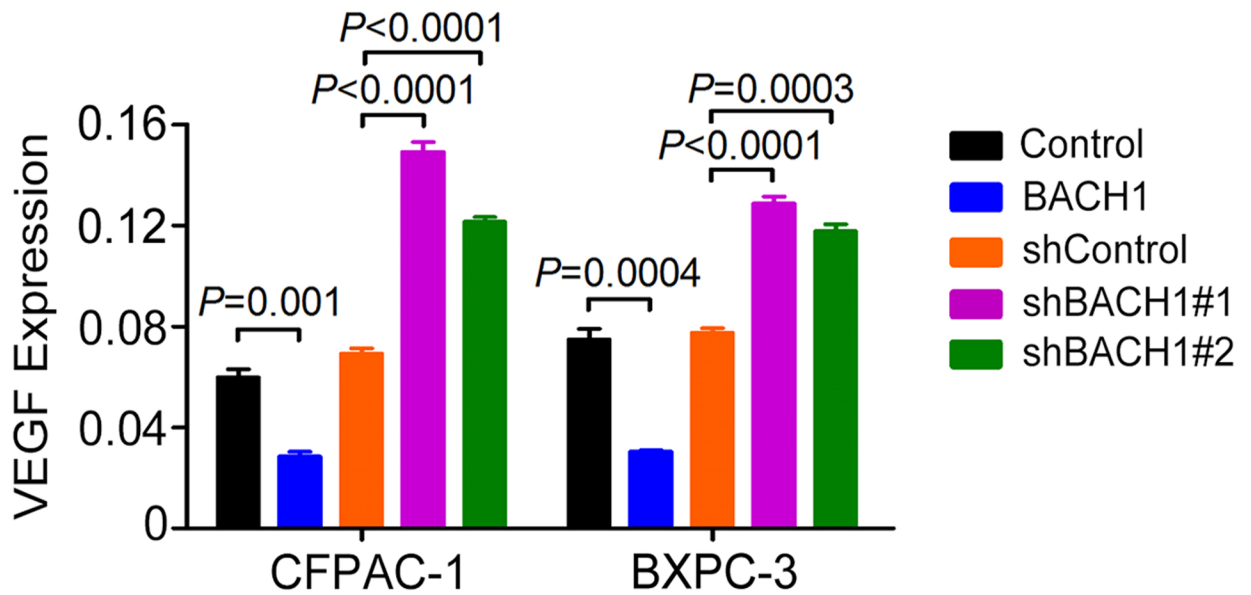

C

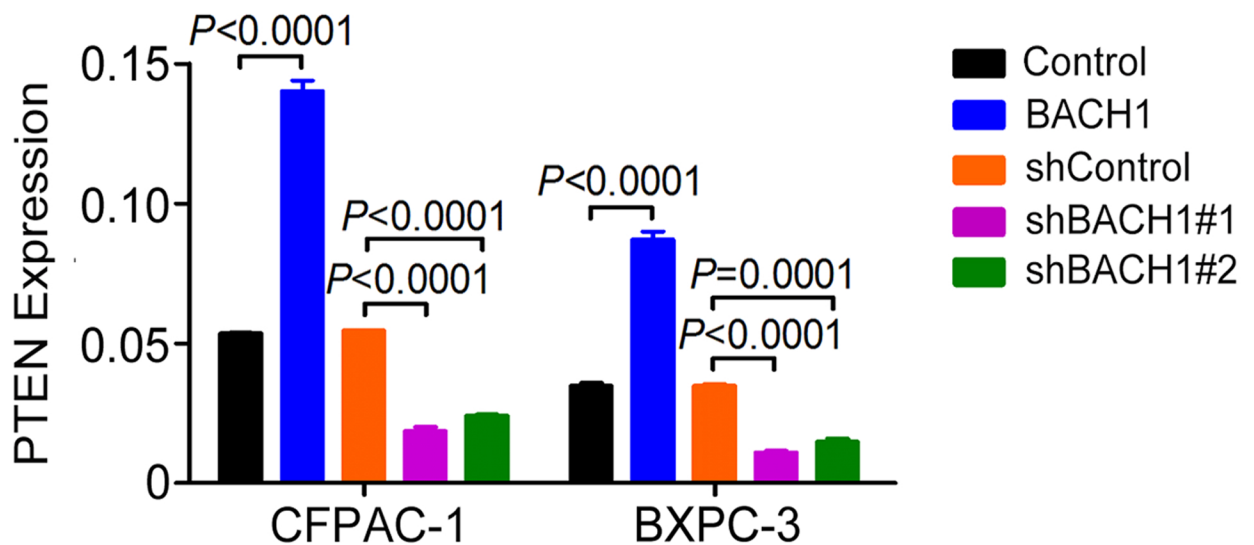

Figure S6

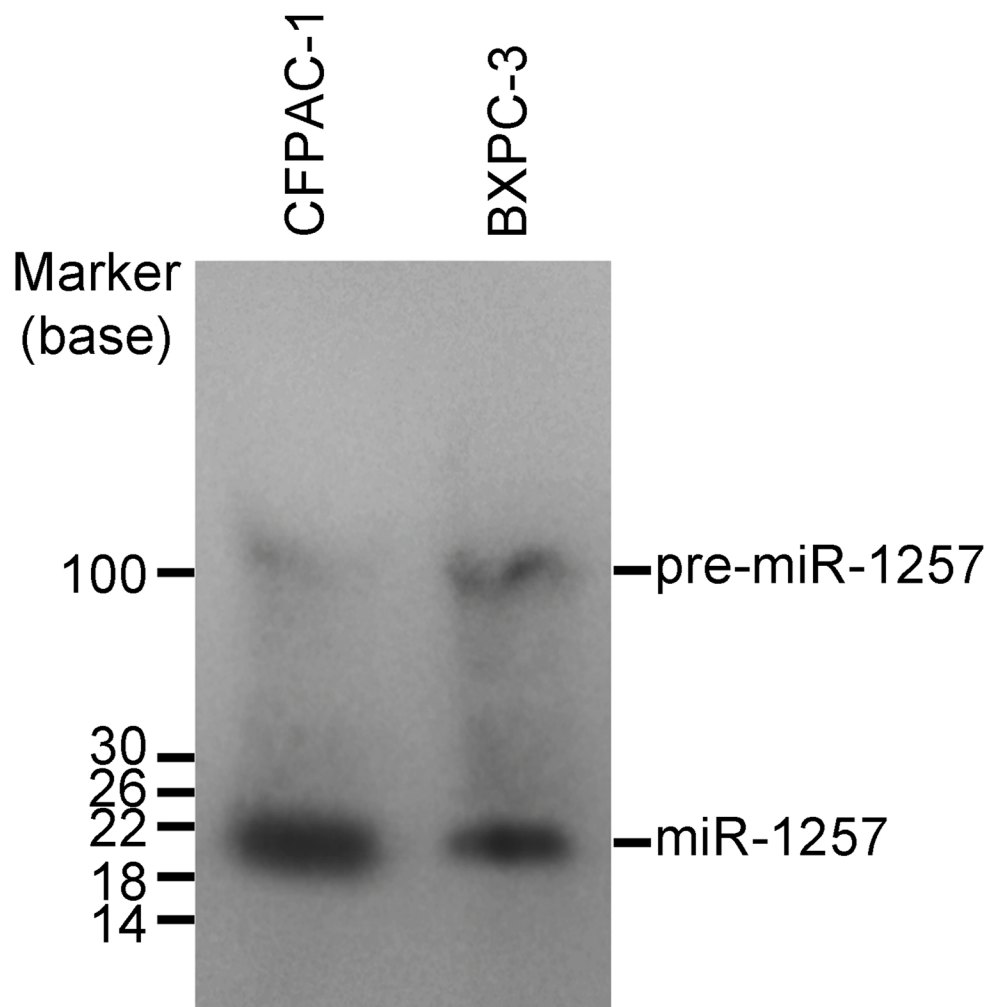

# Figure S7

## BXPC-3 rs372883 CC genotype

T T C A C A T G A T C A T T G **C** T C A C T A T T T T A T G A A C T G

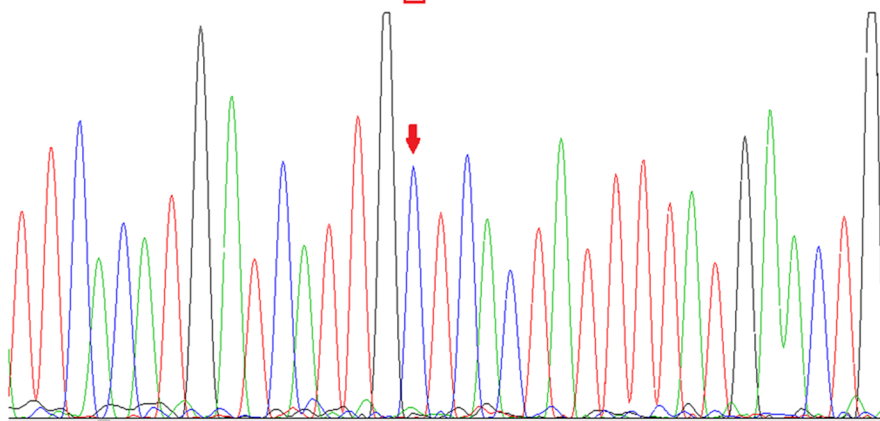

## CFPAC-1 rs372883 CT genotype

T T C A C A T G A T C A T T G **T** T C A C T A T T T T A T G A A C T G

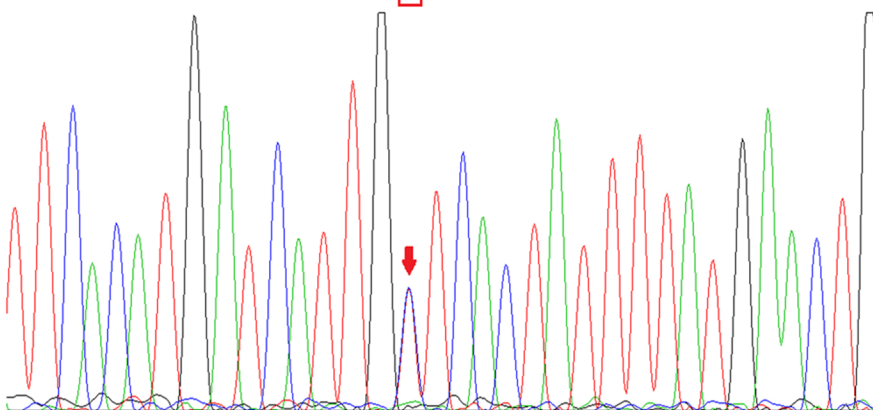

## Capan-2 rs372883 TT genotype

T T C A C A T G A T C A T T G **T** T C A C T A T T T T A T G A A C T G

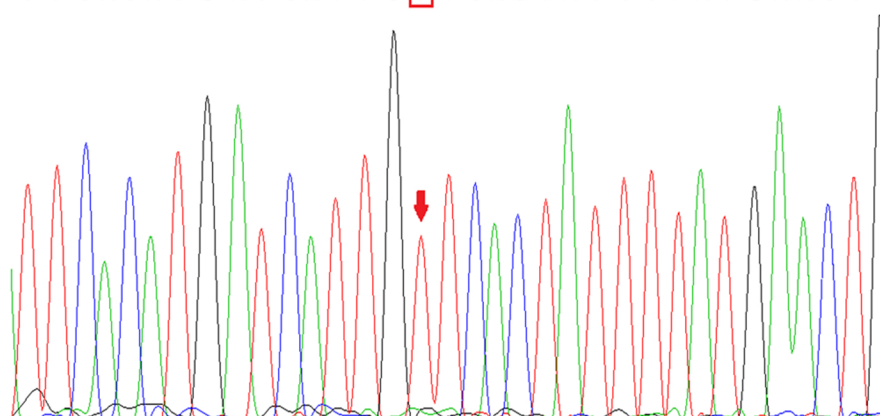

Figure S8

A

BXPC-3  
rs372883 CC genotype

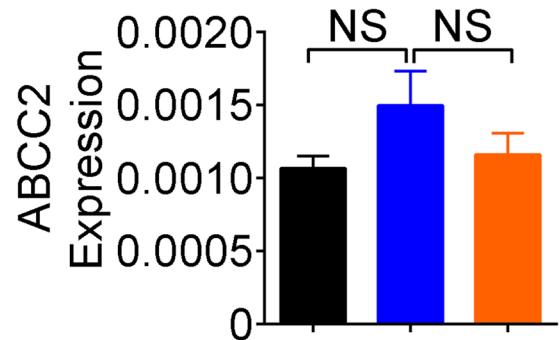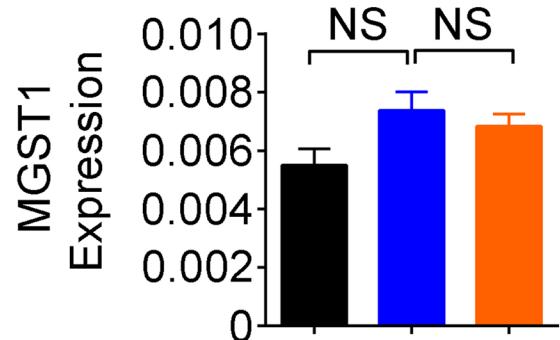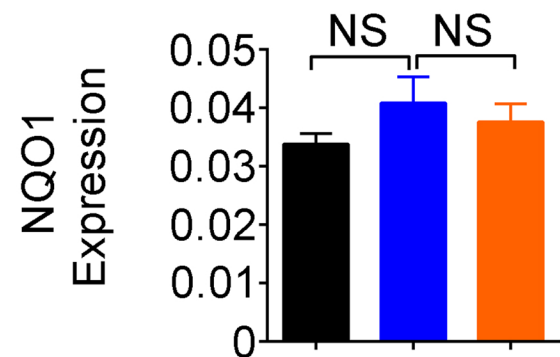

|               |   |   |   |
|---------------|---|---|---|
| miRNA Control | + | - | - |
| miR-1257      | - | + | + |
| Inhibitor     | - | - | + |

B

CFPAC-1  
rs372883 CT genotype

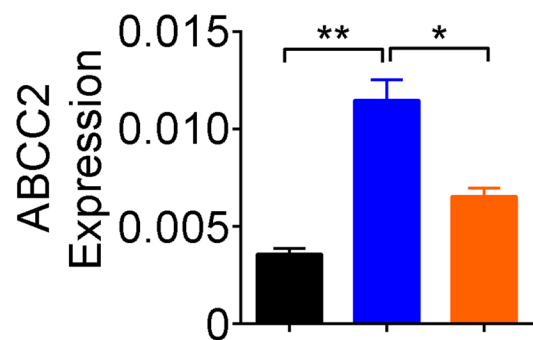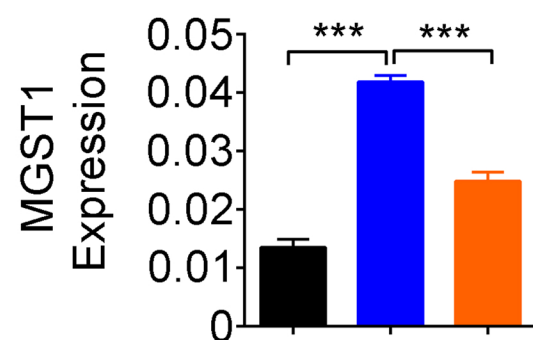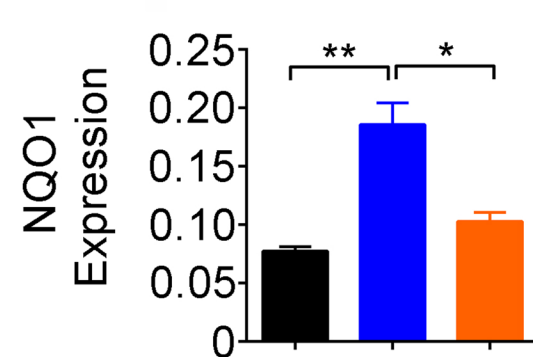

|               |   |   |   |
|---------------|---|---|---|
| miRNA Control | + | - | - |
| miR-1257      | - | + | + |
| Inhibitor     | - | - | + |

C

Capan-2  
rs372883 TT genotype

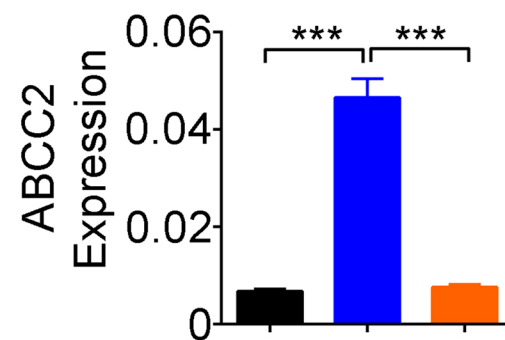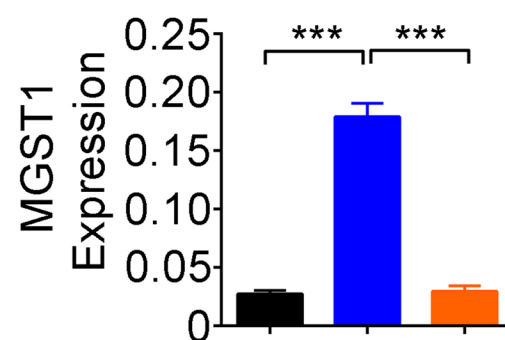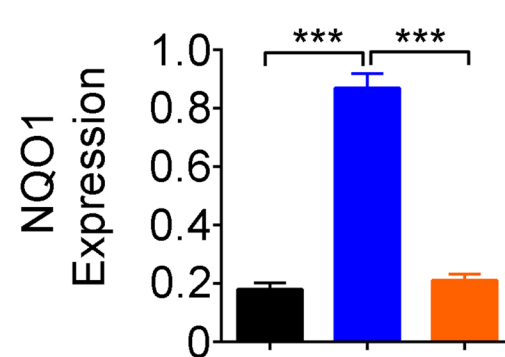

|               |   |   |   |
|---------------|---|---|---|
| miRNA Control | + | - | - |
| miR-1257      | - | + | + |
| Inhibitor     | - | - | + |



Figure S9

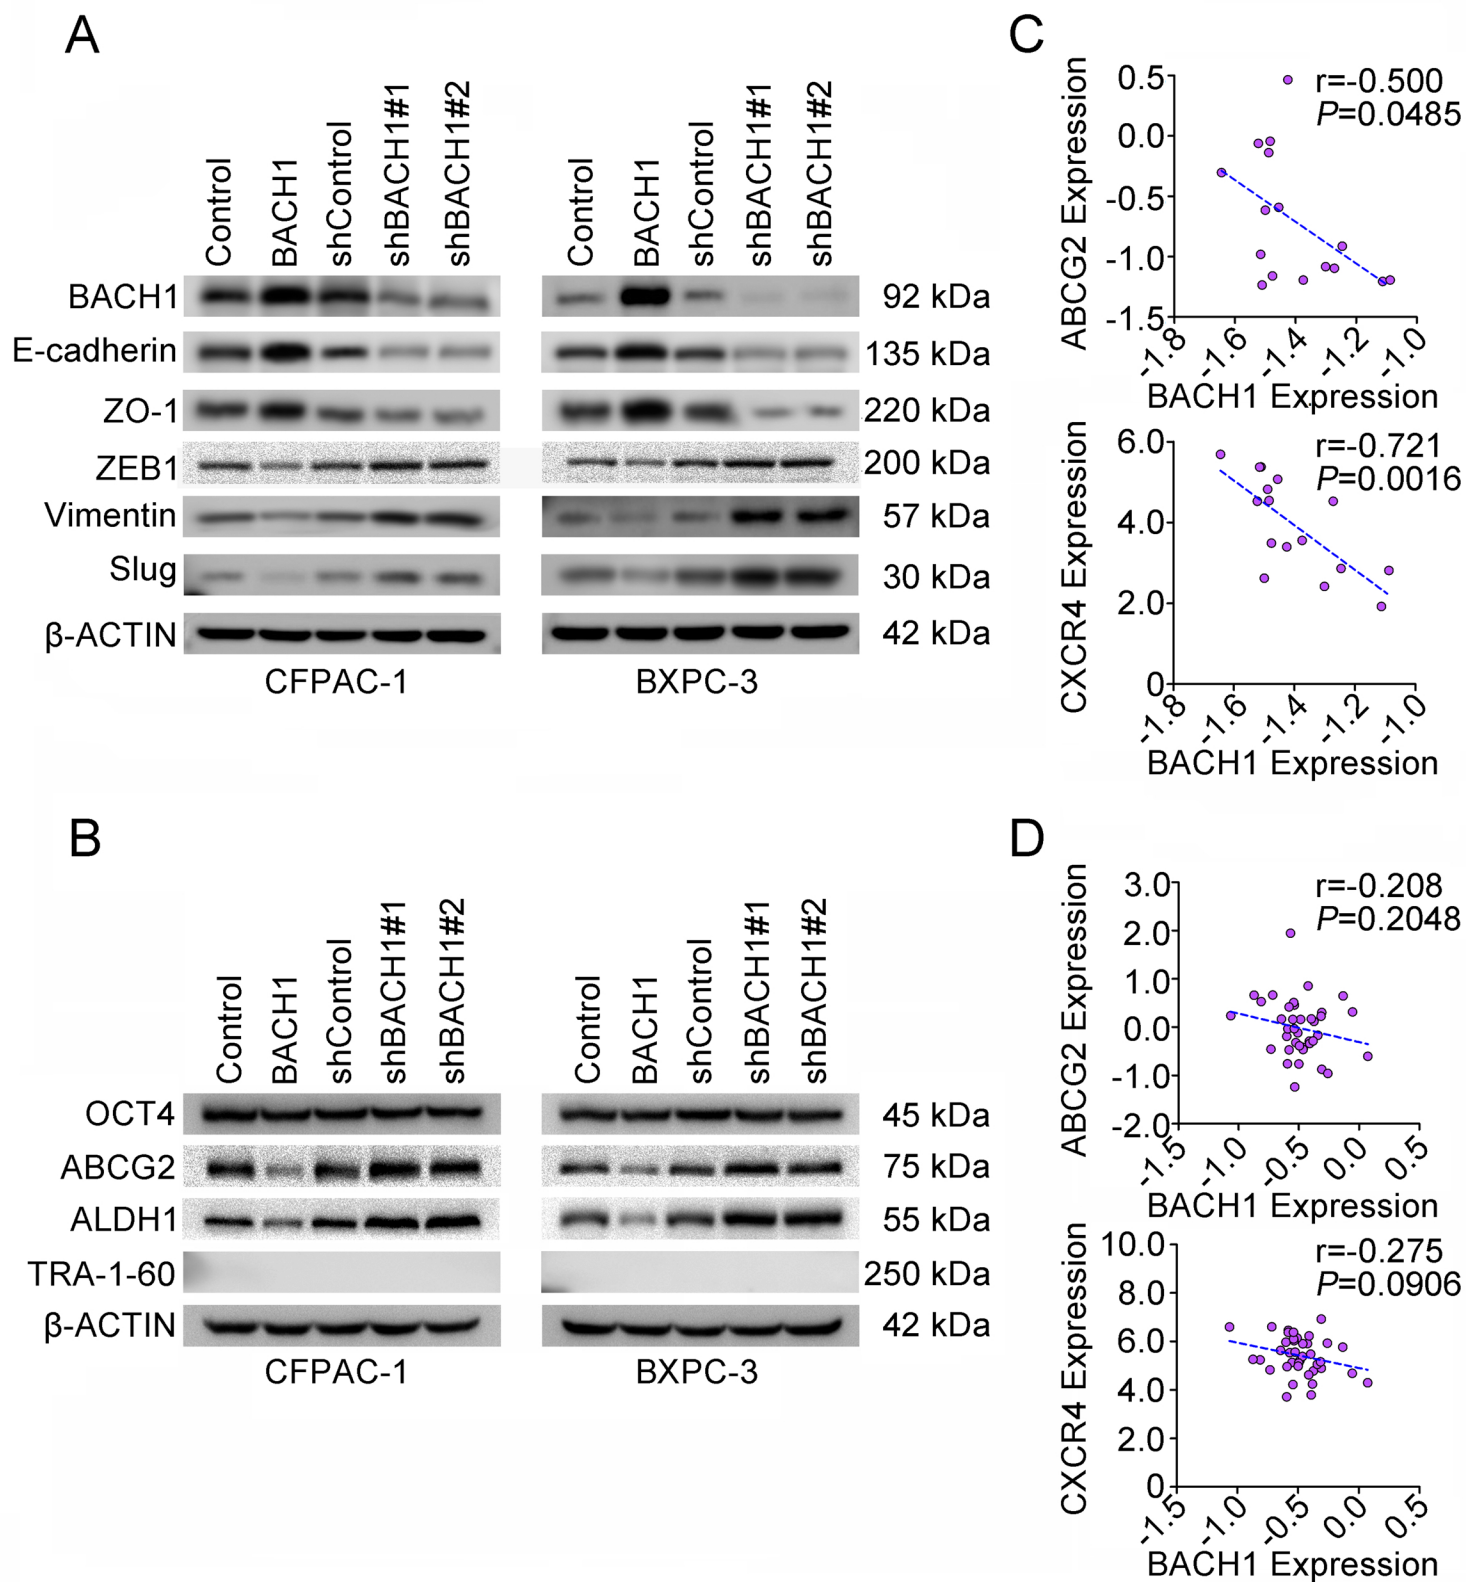



**Supplementary Table S1** Demographic and clinical characteristics of 102 individuals with PDAC in this study

| Characteristics         | No. (%)    | MST* | <i>P</i> <sup>§</sup> | Responders | Non-responders | <i>P</i> <sup>#</sup> |
|-------------------------|------------|------|-----------------------|------------|----------------|-----------------------|
| No. (%)                 | 102 (100%) |      |                       | 16 (15.7)  | 86 (84.3)      |                       |
| Status                  |            |      |                       |            |                |                       |
| Dead                    | 85 (83.3)  | 9.3  |                       | -          | -              |                       |
| Censored                | 17 (16.7)  |      |                       | -          | -              |                       |
| Sex                     |            |      | 0.440                 |            |                | 0.558                 |
| Male                    | 64 (62.7)  | 9.9  |                       | 9 (56.3)   | 55 (64.0)      |                       |
| Female                  | 38 (37.3)  | 8.7  |                       | 7 (43.7)   | 31 (36.0)      |                       |
| Age                     |            |      | 0.657                 |            |                | 0.732                 |
| <57                     | 47 (46.1)  | 10.0 |                       | 8 (50.0)   | 39 (45.3)      |                       |
| ≥57                     | 55 (53.9)  | 8.7  |                       | 8 (50.0)   | 47 (54.7)      |                       |
| Stage                   |            |      | 0.006                 |            |                | 0.921                 |
| Local disease           | 12 (11.8)  | 14.4 |                       | 2 (12.5)   | 10 (11.6)      |                       |
| Local advanced disease  | 25 (24.5)  | 10.0 |                       | 3 (18.8)   | 22 (25.6)      |                       |
| Metastatic disease      | 65 (63.7)  | 7.8  |                       | 11 (68.7)  | 54 (62.8)      |                       |
| Treatment               |            |      | 0.005                 |            |                | 0.512                 |
| Surgery and gemcitabine | 20 (19.6)  | 15.0 |                       | 4 (25.0)   | 16 (18.6)      |                       |
| Gemcitabine alone       | 82 (80.4)  | 8.2  |                       | 12 (75.0)  | 70 (81.4)      |                       |
| Response                |            |      | 0.175                 |            |                |                       |
| Responder (CR+PR)*      | 16 (15.7)  | 12.3 |                       | -          | -              |                       |
| Non-responder (SD+PD)*  | 86 (84.3)  | 8.2  |                       | -          | -              |                       |

\*MST, median survival time (month); CR, complete response; PR, partial response; SD, stable disease; PD, progressive disease.

<sup>§</sup>Log-rank test; <sup>#</sup> $\chi^2$  test or Fisher exact test.

**Supplementary Table S2** Primers and probes used for genotyping, vector construction, ChIP-qPCR, Northern blot or qRT-PCR analysis

|                                  |                                                                  |
|----------------------------------|------------------------------------------------------------------|
| rs372883 genotyping              |                                                                  |
| rs372883 genotyping-F            | CCTTTTCCTTCATGCAGAATTTTG                                         |
| rs372883 genotyping-R            | CAAACATTGAGAAGGCCAGTTCAT                                         |
| rs372883 C allele probe          | FAM-TGATCATTGCTCACTATT-MGB                                       |
| rs372883 T allele probe          | HEX-TGATCATTGTTCACTATTT-MGB                                      |
| Reporter gene construction       | Sequence (5' → 3')                                               |
| BACH1-3'UTR-F                    | CCGCTCGAGACTTGCATTCACTTCCTTCA                                    |
| BACH1-3'UTR-R                    | ATAAGAATGCGGCCGCTTCAATTAGAAGCAAT<br>TTTAGAG                      |
| rs372883T>C-F                    | GCATATTCACATGATCATTGCTCACTATTTTATG<br>AACTGGCC                   |
| rs372883T>C-R                    | GGCCAGTTCATAAAATAGTGAGCAATGATCAT<br>GTGAATATGC                   |
| Lentiviral vector construction   |                                                                  |
| pLv <sub>x</sub> -BACH1-F        | CCGCTCGAGGCCACCATGTCTCTGAGTGAG                                   |
| pLv <sub>x</sub> -BACH1-R        | ATAAGAATGCGGCCGCTTACTCATCAGTAGTAC                                |
| shBACH1-1                        | GATCCCCAGGTCAAAGGACTTTCCTTCTGT<br>CAGATGAAAGTCCTTTGACCTGGTTTTTG  |
| shBACH1-2                        | GATCCGCAGATGACTGATAAATGTCTTCTGTC<br>AGAACATTTATCAGTCATCTGCTTTTTG |
| <i>HMOX1</i> vector construction |                                                                  |
| pcDNA3.1-HMOX1-F                 | CGGGATCCGCCACCATGGAGCGTCCGCAACC                                  |
| pcDNA3.1-HMOX1-R                 | CCGCTCGAGCGGTCACATGGCATAAAGCCCTA<br>C                            |
| <i>HMOX1</i> siRNA               |                                                                  |
| siControl                        | UUCUCCGAACGUGUCACGU                                              |
| siHMOX1-1                        | GGGUGAUAGAAGAGGCCAA                                              |
| siHMOX1-2                        | GGGUCCUACACUCAGCUU                                               |
| <i>HMOX1</i> ChIP-qPCR           |                                                                  |
| EN1-F                            | CACGGTCCCGAGGTCTATT                                              |
| EN1-R                            | TAGACCGTGACTCAGCGAAA                                             |
| EN2-F                            | GAAGGCGGATTTTGCTAGATTT                                           |
| EN2-R                            | CTCCTGCCTACCATTAAAGCTG                                           |

| miR-1257 Northern blot       |                           |
|------------------------------|---------------------------|
| miR-1257 complementary probe | GGTCAGAACCCATCATTCACT-DIG |
| qRT-PCR                      | Sequence (5' → 3')        |
| BACH1-F                      | GAAAGATGTGCTGTGCGATG      |
| BACH1-R                      | CACACTTCATCCACATTCTCTTTAC |
| HMOX1-F                      | CAGCGGGCCAGCAACAAAGT      |
| HMOX1-R                      | ACCCATCGGAGAAGCGGAGC      |
| HIF1A-F                      | TACCCTAACTAGCCGAGGAAGAA   |
| HIF1A-R                      | ACACTGAGGTTGGTTACTGTTGG   |
| VEGF-F                       | AGGGCAGAATCATCACGAAGT     |
| VEGF-R                       | AGGGTCTCGATTGGATGGCA      |
| PTEN-F                       | CTGAAAGACATTATGACACCGC    |
| PTEN-R                       | TATCATTACACCAGTTCGTCCCT   |
| NRF2-F                       | TTCCCGGTCACATCGAGAG       |
| NRF2-R                       | TCCTGTTGCATAACCGTCTAAATC  |
| FTL-F                        | CAGCCGTCAACAGCCTGGTCAAT   |
| FTL-R                        | CTCACGCCTTCCAGAGCCACATC   |
| FTH1-F                       | CGAGGTGGCCGAATCTTCC       |
| FTH1-R                       | GTTTGTGCAGTTCCAGTAGTGA    |
| SQSTM1-F                     | GACTACGACTTGTGTAGCGTC     |
| SQSTM1-R                     | AGTGTCCGTGTTTCACCTTCC     |
| TFE3-F                       | CCGTGTTTCGTGCTGTTGGA      |
| TFE3-R                       | GCTCGTAGAAGCTGTCAGGAT     |
| GCLC-F                       | GGAAGTGGATGTGGACACCAGA    |
| GCLC-R                       | GCTTGTAGTCAGGATGGTTTGCG   |
| NQO2-F                       | GTACTCATTGTCTATGCACACCA   |
| NQO2-R                       | TGCCTGCTCAGTTCATCTACA     |
| ITPR2-F                      | GGTTGGAGACTATCAGCTCGCT    |
| ITPR2-R                      | GCATCATTGGGCTGAACTGGTG    |
| ABCC2-F                      | CCCTGCTGTTTCGATATACCAATC  |
| ABCC2-R                      | TCGAGAGAATCCAGAATAGGGAC   |
| MGST1-F                      | ATTGGCCTCCTGTATTCTTGA     |

|                          |                          |
|--------------------------|--------------------------|
| MGST1-R                  | GTGCTCCGACAAATAGTCTGAAG  |
| NQO1-F                   | GAAGAGCACTGATCGTACTGGC   |
| NQO1-R                   | GGATACTGAAAGTTCGCAGGG    |
| GAPDH-F                  | TTGGCCAGGGGTGCTAAG       |
| GAPDH-R                  | AGCCAAAAGGGTCATCATCTC    |
| miR-1257-F               | AGTGAATGATGGGTTCTGACCAAA |
| U6-F                     | CTCGCTTCGGCAGCACA        |
| Universal reverse primer | GCTGTCAACGATACGCTACCTA   |

**Supplementary Table S3** Gene set enrichment analysis (GSEA) of differentially expressed genes in PDAC cells with *BACH1* knockdown

| Gene set name                              | ES   | NES  | Nom<br><i>P</i> -value | FDR   |
|--------------------------------------------|------|------|------------------------|-------|
| HALLMARK_REACTIVE_OXIGEN_SPECIES_PATHWAY   | 0.41 | 2.05 | 0.001                  | 0.006 |
| HALLMARK_GLYCOLYSIS                        | 0.24 | 1.58 | 0.005                  | 0.087 |
| HALLMARK_ANGIOGENESIS                      | 0.37 | 1.51 | 0.068                  | 0.089 |
| HALLMARK_COMPLEMENT                        | 0.24 | 1.51 | 0.001                  | 0.111 |
| HALLMARK_XENOBIOTIC_METABOLISM             | 0.25 | 1.59 | 0.004                  | 0.125 |
| HALLMARK_MTORC1_SIGNALING                  | 0.21 | 1.40 | 0.021                  | 0.159 |
| HALLMARK_HYPOXIA                           | 0.21 | 1.37 | 0.029                  | 0.163 |
| HALLMARK_MYC_TARGETS_V2                    | 0.26 | 1.30 | 0.102                  | 0.218 |
| HALLMARK_P53_PATHWAY                       | 0.19 | 1.28 | 0.070                  | 0.218 |
| HALLMARK_EPITHELIAL_MESENCHYMAL_TRANSITION | 0.19 | 1.26 | 0.103                  | 0.222 |

ES: Enrichment score; NES: Normalized enrichment score; Nom *P*-value: nominal *P*-value; FDR: false discovery rate
